# Supplementary material
Source: publisher figshare collection journal article supplement (https://sage.figshare.com/ndownloader/files/20754381)
Supplement: Supplementary file 1 [file 20754381]

**Appendix Table A1:** The table shows the univariate analysis for independent predictor factors, none among those listed was found to be significant for ipsilateral ACL revision.

| Variable                                   | Total No. | ACL Revisions | Survivorship free from surgery (%) |        |        |        |         | p-value | Hazard Ratio (HR) |           |           |
|--------------------------------------------|-----------|---------------|------------------------------------|--------|--------|--------|---------|---------|-------------------|-----------|-----------|
|                                            |           |               | 2-year                             | 4-year | 6-year | 8-year | 10-year |         | HR                | 95% CI    | p-value   |
| <b>All subjects</b>                        | 244       | 8 (3.3%)      | 98.8                               | 98.0   | 98.0   | 97.1   | 96.3    |         |                   |           |           |
| <b>Sex</b>                                 |           |               |                                    |        |        |        |         |         |                   |           |           |
| Male                                       | 186       | 6 (3.2%)      | 98.4                               | 97.8   | 97.3   | 97.3   | 96.6    | =0.9529 | 1.0               | 0.2 - 5.3 | Reference |
| Female                                     | 58        | 2 (3.4%)      | 100                                | 98.3   | 98.3   | 96.6   | 96.6    |         |                   |           |           |
| <b>Age</b>                                 |           |               |                                    |        |        |        |         |         |                   |           |           |
| ≥18 years (old)                            | 215       | 7 (3.2%)      | 99.1                               | 98.1   | 97.7   | 97.2   | 96.3    | =0.9655 | 1.0               | 0.1 - 8.8 | Reference |
| <18 years (young)                          | 29        | 1 (3.4%)      | 96.6                               | 96.6   | 96.6   | 96.6   | 96.6    |         |                   |           |           |
| <b>Preoperative Tegner</b>                 |           |               |                                    |        |        |        |         |         |                   |           |           |
| <7 (low)                                   | 108       | 3 (2.8%)      | 99.1                               | 98.1   | 98.1   | 97.2   | 97.2    | =0.7693 | 1.3               | 0.3 - 5.2 | Reference |
| ≥7 (high)                                  | 136       | 5 (3.7%)      | 98.5                               | 97.8   | 97.8   | 97.1   | 95.8    |         |                   |           |           |
| <b>Age and Preoperative Tegner</b>         |           |               |                                    |        |        |        |         |         |                   |           |           |
| ≥18 years (old), <7 (low)                  | 97        | 3 (3.1%)      | 99.0                               | 97.9   | 97.9   | 96.9   | 96.9    | =0.9832 | 1.1               | 0.2 - 4.7 | Reference |
| ≥18 years (old), ≥7 (high)                 | 118       | 4 (3.3%)      | 99.2                               | 98.3   | 98.3   | 97.5   | 95.9    |         |                   |           |           |
| <18 years (young), <7 (low)                | 11        | 0 (0.0%)      | 100                                | 100    | 100    | 100    | 100     |         |                   |           |           |
| <18 years (young), ≥7 (high)               | 18        | 1 (5.6%)      | 100                                | 94.4   | 94.4   | 94.4   | 94.4    |         |                   |           |           |
| <b>Acute Reconstruction (&lt;3 months)</b> |           |               |                                    |        |        |        |         |         |                   |           |           |
| No                                         | 183       | 7 (3.8%)      | 98.4                               | 97.8   | 97.8   | 96.7   | 95.6    | =0.3888 | 0.4               | 0.1 - 2.0 | Reference |
| Yes                                        | 61        | 1 (1.6%)      | 100                                | 98.4   | 98.4   | 98.4   | 98.4    |         |                   |           |           |
| <b>Overweight (BMI ≥25)</b>                |           |               |                                    |        |        |        |         |         |                   |           |           |
| No                                         | 168       | 6 (3.6%)      | 98.8                               | 98.2   | 98.2   | 97.0   | 95.8    | =0.7041 | 0.7               | 0.2 - 3.3 | Reference |
| Yes                                        | 76        | 2 (2.6%)      | 98.7                               | 97.4   | 97.4   | 97.4   | 97.4    |         |                   |           |           |
| <b>Smoke</b>                               |           |               |                                    |        |        |        |         |         |                   |           |           |
| No                                         | 169       | 5 (3.0%)      | 99.4                               | 98.2   | 98.2   | 97.6   | 96.5    | =0.6643 | 1.4               | 0.3 - 6.2 | Reference |
| Yes                                        | 75        | 3 (4.0%)      | 97.3                               | 97.3   | 97.3   | 96.0   | 96.0    |         |                   |           |           |

**Appendix Table A2:** The table shows the univariate analysis for independent predictor factors, Age at surgery <18 and high activity level (Tegner ≥7) were found to be significant for contralateral ACL failure; the combination of these two factors had the higher hazard ratio.

| Variable                                   | Total No. | Contralateral Ruptures | Survivorship free from surgery (%) |        |        |        |         | p-value  | Hazard Ratio (HR) |                         |          |
|--------------------------------------------|-----------|------------------------|------------------------------------|--------|--------|--------|---------|----------|-------------------|-------------------------|----------|
|                                            |           |                        | 2-year                             | 4-year | 6-year | 8-year | 10-year |          | HR                | 95% CI                  | p-value  |
| <b>All subjects</b>                        | 244       | 19 (7.8%)              | 98.4                               | 95.5   | 92.6   | 92.2   | 92.2    |          |                   |                         |          |
| <b>Sex</b>                                 |           |                        |                                    |        |        |        |         |          |                   |                         |          |
| Male                                       | 186       | 17 (9.4%)              | 97.8                               | 95.2   | 91.4   | 90.9   | 90.9    | =0.1660  | 0.4               | Reference<br>0.1 - 1.6  | =0.1831  |
| Female                                     | 58        | 2 (3.5%)               | 100                                | 96.6   | 96.6   | 96.6   | 96.6    |          |                   |                         |          |
| <b>Age</b>                                 |           |                        |                                    |        |        |        |         |          |                   |                         |          |
| ≥18 years (old)                            | 215       | 13 (6.1%)              | 99.1                               | 97.2   | 94.4   | 94.0   | 94.0    | =0.0029* | 3.4               | Reference<br>1.4 - 8.3  | =0.0065* |
| <18 years (young)                          | 29        | 6 (20.7%)              | 93.1                               | 82.8   | 79.3   | 79.3   | 79.3    |          |                   |                         |          |
| <b>Preoperative Tegner</b>                 |           |                        |                                    |        |        |        |         |          |                   |                         |          |
| <7 (low)                                   | 108       | 1 (0.9%)               | 100                                | 100    | 99.1   | 99.1   | 99.1    | =0.0004* | 15.2              | Reference<br>6.1 - 37.5 | =0.0091* |
| ≥7 (high)                                  | 136       | 18 (13.2%)             | 97.1                               | 91.9   | 87.5   | 86.8   | 86.8    |          |                   |                         |          |
| <b>Age and Preoperative Tegner</b>         |           |                        |                                    |        |        |        |         |          |                   |                         |          |
| ≥18 years (old) , <7 (low)                 | 97        | 1 (1.0%)               | 100                                | 100    | 99.0   | 99.0   | 99.0    | =0.0001* | 10.2              | Reference<br>3.9 - 26.5 | =0.0256* |
| ≥18 years (old), ≥7 (high)                 | 118       | 12 (10.2%)             | 98.3                               | 94.9   | 90.7   | 89.8   | 89.8    |          |                   |                         |          |
| <18 years (young), <7 (low)                | 11        | 0 (0.0%)               | 100                                | 100    | 100    | 100    | 100     |          |                   |                         |          |
| <18 years (young), ≥7 (high)               | 18        | 6 (33.3%)              | 88.9                               | 72.2   | 66.7   | 66.7   | 66.7    |          |                   |                         |          |
| <b>Acute Reconstruction (&lt;3 months)</b> |           |                        |                                    |        |        |        |         |          |                   |                         |          |
| No                                         | 183       | 14 (7.6%)              | 100                                | 96.2   | 92.9   | 92.3   | 92.3    | =0.8736  | 1.1               | Reference<br>0.4 - 2.8  | =0.8902  |
| Yes                                        | 61        | 5 (8.2%)               | 98.4                               | 93.4   | 91.8   | 91.8   | 91.8    |          |                   |                         |          |
| <b>Overweight (BMI ≥25)</b>                |           |                        |                                    |        |        |        |         |          |                   |                         |          |
| No                                         | 168       | 15 (8.9%)              | 97.6                               | 94.0   | 91.1   | 91.1   | 91.1    | =0.3093  | 0.6               | Reference<br>0.4 - 3.1  | =0.3326  |
| Yes                                        | 76        | 4 (5.3%)               | 100                                | 98.7   | 96.1   | 94.7   | 94.7    |          |                   |                         |          |

|       |     |           |      |      |      |      |      |         |     |                        |         |
|-------|-----|-----------|------|------|------|------|------|---------|-----|------------------------|---------|
| Smoke |     |           |      |      |      |      |      |         |     |                        |         |
| No    | 169 | 11 (6.5%) | 98.2 | 95.9 | 93.5 | 93.5 | 93.5 | =0.2723 | 1.6 | Reference<br>0.7 - 3.9 | =0.2653 |
| Yes   | 75  | 8 (10.7%) | 98.7 | 94.7 | 90.7 | 89.3 | 89.3 |         |     |                        |         |

**Appendix Table A3:** The table shows the univariate analysis for independent predictor factors, Age at surgery <18 and high activity level (Tegner ≥7) were found to be significant for a second ACL rupture; as for a contralateral injury the combination of these two factors had the higher hazard ratio.

| Variable                                   | Total No. | Second Ruptures | Survivorship free from surgery (%) |        |        |        |         | p-value  | Hazard Ratio (HR) |                         |           |
|--------------------------------------------|-----------|-----------------|------------------------------------|--------|--------|--------|---------|----------|-------------------|-------------------------|-----------|
|                                            |           |                 | 2-year                             | 4-year | 6-year | 8-year | 10-year |          | HR                | 95% CI                  | p-value   |
| <b>All subjects</b>                        | 244       | 26 (10.7%)      | 97.1                               | 93.4   | 90.6   | 89.3   | 89.3    |          |                   |                         |           |
| <b>Sex</b>                                 |           |                 |                                    |        |        |        |         |          |                   |                         |           |
| Male                                       | 186       | 4 (6.9%)        | 96.2                               | 93.0   | 89.2   | 88.2   | 88.2    | =0.2892  | 0.6               | Reference<br>0.2 – 1.6  | p=0.3017  |
| Female                                     | 58        |                 | 100                                | 94.2   | 94.2   | 93.1   | 93.1    |          |                   |                         |           |
| <b>Age</b>                                 |           |                 |                                    |        |        |        |         |          |                   |                         |           |
| ≥18 years (old)                            | 215       | 19 (8.8%)       | 98.1                               | 94.9   | 92.6   | 91.2   | 91.2    | =0.0059* | 2.7               | Reference<br>1.2 – 5.9  | p=0.0110* |
| <18 years (young)                          | 29        | 7 (24.1%)       | 89.7                               | 79.3   | 75.9   | 75.9   | 75.9    |          |                   |                         |           |
| <b>Preoperative Tegner</b>                 |           |                 |                                    |        |        |        |         |          |                   |                         |           |
| <7 (low)                                   | 108       | 4 (3.7)         | 99.1                               | 98.1   | 97.2   | 96.3   | 96.3    | =0.0018* | 4.7               | Reference<br>2.2 - 10.1 | =0.0052*  |
| ≥7 (high)                                  | 136       | 22 (16.2%)      | 95.6                               | 89.7   | 85.3   | 83.8   | 83.8    |          |                   |                         |           |
| <b>Age and Preoperative Tegner</b>         |           |                 |                                    |        |        |        |         |          |                   |                         |           |
| ≥18 years (old) , <7 (low)                 | 97        | 4 (4.2%)        | 99.0                               | 97.9   | 96.9   | 95.9   | 95.9    | =0.0001* | 3.2               | Reference<br>1.4 - 7.2  | =0.0391*  |
| ≥18 years (old), ≥7 (high)                 | 118       | 15 (12.8%)      | 97.5                               | 93.2   | 89.0   | 87.3   | 87.3    |          |                   |                         |           |
| <18 years (young), <7 (low)                | 11        | 0 (0%)          | 100                                | 100    | 100    | 100    | 100     |          |                   |                         |           |
| <18 years (young), ≥7 (high)               | 18        | 7 (39%)         | 83.3                               | 66.7   | 61.1   | 61.1   | 61.1    |          |                   |                         |           |
| <b>Acute Reconstruction (&lt;3 months)</b> |           |                 |                                    |        |        |        |         |          |                   |                         |           |
| No                                         | 183       | 20 (10.1%)      | 96.7                               | 94.0   | 90.7   | 89.1   | 89.1    | =0.8217  | 0.9               | Reference<br>0.4 - 2.2  | =0.8113   |
| Yes                                        | 61        | 6 (9.8%)        | 98.4                               | 91.8   | 90.2   | 90.2   | 90.2    |          |                   |                         |           |
| <b>Overweight (BMI ≥25)</b>                |           |                 |                                    |        |        |        |         |          |                   |                         |           |
| No                                         | 168       | 20 (11.9%)      | 96.4                               | 92.3   | 89.3   | 88.1   | 88.1    | =0.3402  | 0.6               | Reference<br>0.3 - 1.5  | =0.3554   |
| Yes                                        | 76        | 6 (7.9%)        | 98.7                               | 96.1   | 94.7   | 93.4   | 93.4    |          |                   |                         |           |

| Smoke |     |            |       |       |       |       |       |         |     |           |          |
|-------|-----|------------|-------|-------|-------|-------|-------|---------|-----|-----------|----------|
| No    | 169 | 15 (8.8%)  | 97.6% | 94.1% | 92.7% | 91.1% | 91.1% |         |     | Reference |          |
| Yes   | 75  | 11 (14.7%) | 96.0% | 92.0% | 88.0% | 85.3% | 85.3% | =0.1823 | 1.7 | 0.8 – 3.4 | p=0.1769 |
